# Supplementary material for: Facile synthesis of metal oxide/reduced graphene oxide hybrids with high lithium storage capacity and stable cyclability
Source: Royal Society of Chemistry journal article supplement (doi:10.1039/c0nr00744g), 2010-12-22
Supplement: c0nr00744g.pdf [file c0nr00744g.pdf]

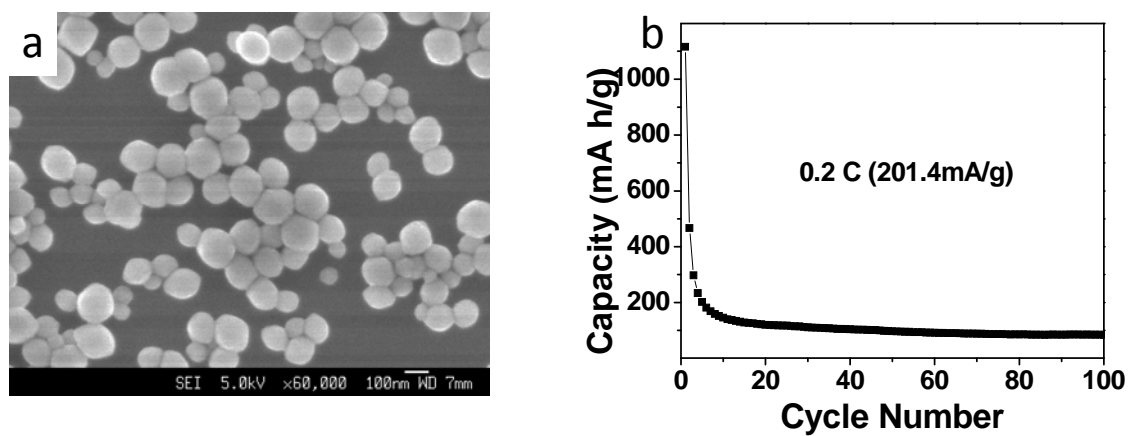

Figure S1 (a) FESEM image of the pure Fe<sub>2</sub>O<sub>3</sub> nanoparticles and (b) charge/discharge cycling performance of the Fe<sub>2</sub>O<sub>3</sub> electrode at current densities of 201.4 mA/g (0.2 C) within a voltage window of 0.01-3.0 V.
